# Supplementary material
Source: PubMed Central journal article supplement (PMC4691262)
Supplement: NIHMS489421-supplement-Supplementary_Table_1.pdf [file NIHMS489421-supplement-Supplementary_Table_1.pdf]

Supplementary Table 1: Diagnostic subtypes and specific antipsychotic medications in the two schizophrenia subgroups (several subjects in each group were prescribed more than one antipsychotic medication).

|                                         | <b>Auditory Training<br/>SZ subgroup<br/>(N=30)</b> | <b>Computer Games<br/>SZ subgroup<br/>(N=26)</b> |
|-----------------------------------------|-----------------------------------------------------|--------------------------------------------------|
| <b>DIAGNOSTIC<br/>SUBTYPES</b>          |                                                     |                                                  |
| Catatonic                               | 1                                                   | 1                                                |
| Paranoid                                | 6                                                   | 10                                               |
| Residual                                | 2                                                   | 0                                                |
| Schizoaffective                         | 10                                                  | 11                                               |
| Disorganized                            | 4                                                   | 6                                                |
| <b>ANTIPSYCHOTIC<br/>MEDICATIONS</b>    |                                                     |                                                  |
| <b>First Generation<br/>Agents</b>      |                                                     |                                                  |
| Haloperidol                             | 1                                                   | 2                                                |
| Thiothixene                             | 0                                                   | 1                                                |
| Thioridazine                            | 1                                                   | 0                                                |
| TOTAL                                   | 2                                                   | 3                                                |
| <b>Second<br/>Generation<br/>Agents</b> |                                                     |                                                  |
| Clozapine                               | 4                                                   | 3                                                |
| Olanzapine                              | 7                                                   | 5                                                |
| Quetiapine                              | 5                                                   | 7                                                |
| Risperidone                             | 13                                                  | 12                                               |
| Ziprasidone                             | 3                                                   | 2                                                |
| TOTAL                                   | 32                                                  | 29                                               |
| <b>Third Generation<br/>Agents</b>      |                                                     |                                                  |
| Aripiprazole                            | 5                                                   | 8                                                |
